# Supplementary material
Source: Elsevier journal article supplement (https://www.sciencedirect.com/science/article/pii/S217358081830097X)
Supplement: mmc1 [file S217358081830097X:mmc1.pdf]

## ESCALA DEL DOLOR S-LANSS

Evaluación de signos y síntomas neuropáticos de Leeds (auto-cumplimentación)

NOMBRE \_\_\_\_\_ FECHA \_\_\_\_\_

- Este cuestionario puede proporcionarnos información sobre el tipo de dolor que usted está experimentando. De este modo, puede ayudarnos a seleccionar la mejor opción de tratamiento para su dolor.
- Por favor, coloree en el siguiente diagrama las zonas donde usted siente dolor. En caso de presentar dolor en más de una zona, **solamente coloree la zona donde el dolor es más intenso (área de dolor principal)**.

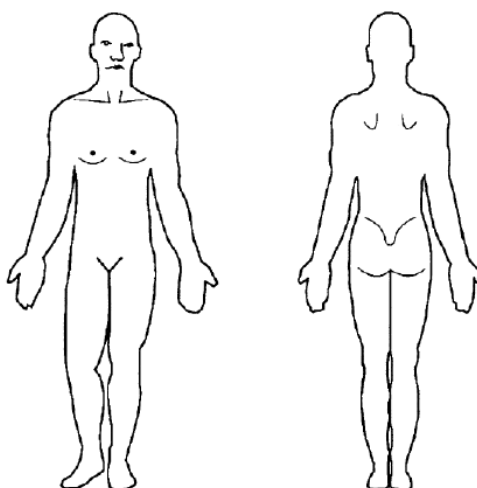

- Por favor, indique en la siguiente escala la intensidad de su dolor (el dolor dibujado en el diagrama anterior) durante la última semana, donde:  
“0” refleja sin dolor y “10” refleja dolor de mayor intensidad posible.

|           |   |   |   |   |   |   |   |   |   |   |    |                                   |
|-----------|---|---|---|---|---|---|---|---|---|---|----|-----------------------------------|
| SIN DOLOR | 0 | 1 | 2 | 3 | 4 | 5 | 6 | 7 | 8 | 9 | 10 | DOLOR DE MAYOR INTENSIDAD POSIBLE |
|-----------|---|---|---|---|---|---|---|---|---|---|----|-----------------------------------|

- 
- En el reverso de esta página, hay 7 preguntas sobre su dolor (el del diagrama).
  - Piense como percibió el dolor indicado en el diagrama **durante la última semana**. Realice un círculo alrededor de las descripciones más concordantes con su dolor. Estas descripciones pueden coincidir con su dolor o no hacerlo, pero no atienden a la intensidad del mismo.
  - Únicamente haga un círculo alrededor de las respuestas que describen su dolor. **Por favor, de la vuelta a la página.**

### S-LANSS

- 1. En el área donde usted tiene dolor ¿También tiene sensación de “pinchazos” o sensación de picor u hormigueo?**
  - a) NO - no tengo esas sensaciones.
  - b) SI - tengo esas sensaciones a menudo.
- 2. ¿Cambia de color la zona dolorida (quizá se ve enrojecida), cuando usted siente dolor?**
  - a) NO - el dolor no afecta al color de mi piel.
  - b) SI - me he dado cuenta de que el dolor cambia el aspecto habitual de mi piel.
- 3. En el área donde usted tiene dolor ¿Su piel presenta una sensibilidad anormal al tacto? Por ejemplo, al acariciar ligeramente la piel se producen sensaciones desagradables o dolorosas.**
  - a) NO - el dolor no hace que mi piel en esa zona este anormalmente sensible al tacto.
  - b) SI - mi piel en la zona de dolor es especialmente sensible al tacto.
- 4. ¿El dolor aparece de repente y en ráfagas sin razón aparente, aunque esté completamente quieto? Estas sensaciones se podrían describir como “descargas eléctricas” o ráfagas.**
  - a) NO - mi dolor realmente no se percibe así.
  - b) SI - tengo estas sensaciones a menudo.
- 5. En el área donde usted tiene dolor, ¿Siente calor o un dolor quemante (quemazón)?**
  - a) NO - no tengo dolor quemante.
  - b) SI - tengo dolor quemante a menudo.
- 6. Frótese suavemente con el dedo índice el área que le duele y después realice lo mismo en un área sin dolor (por ejemplo, en un área de piel alejada o en el lado opuesto a la zona del dolor). ¿Cómo siente ese frotamiento en la zona de dolor?**
  - a) No hay diferencias entre la sensación del área con dolor y sin dolor.
  - b) En el área de dolor siento malestar, como pinchazos, hormigueo o quemazón, que es diferente a la sensación de la zona sin dolor.
- 7. Presione suavemente con su dedo un área que le duela y luego presione de la misma forma en otra área que no le duela (la misma zona sin dolor que seleccionó en la pregunta anterior) ¿Cómo siente la presión en el área de dolor?**
  - a) No hay diferencias entre la sensación del área con dolor y sin dolor.
  - b) En el área del dolor siento adormecimiento o una sensibilidad diferente a la zona sin dolor.
